# Supplementary material
Source: Research Square preprint supplement (doi:10.21203/rs.3.rs-9962383/v1)
Supplement: Supplementary file 1 [file d462889f89b510b1e56f1d0a.docx]

# Supplementary Appendix A: Technical Statistical Details

*This appendix contains technical details for statistically-oriented readers; the main text provides a conceptual overview sufficient to evaluate the study findings.*

## A.1 Prior Distributions

Weakly informative priors were specified to constrain estimates to plausible ranges while allowing the data to dominate inference:

- Global intercept: α ~ Normal(0, 1) [~25–75% on the probability scale]
- Temporal trends: β1 ~ Normal(0, 0.5), β2 ~ Normal(0, 0.5)
- Disease-specific SD: σ_δ ~ HalfNormal(0.2)
- Trial-level SD: σ_ε ~ HalfNormal(0.3)
- Disease-specific offsets (non-centered): δd = μ_δ + σ_δ × δd,raw, where δd,raw ~ Normal(0, 1)

Prior sensitivity analysis confirmed robustness: participation estimates changed <1% and variance decomposition proportions shifted <2 percentage points when priors were widened (σ_δ ~ HalfNormal(1.0)) or tightened (σ_δ ~ HalfNormal(0.1)).

## A.2 Sampling Algorithm

Sampling used the No-U-Turn Sampler (NUTS), a Hamiltonian Monte Carlo variant that adapts step size and trajectory length automatically.[9,10] We ran 4 parallel chains with 10,000 iterations each (2,000 warm-up steps discarded), yielding 32,000 posterior draws. Non-centered parameterization was used for disease-specific offsets to improve mixing.

## A.3 Convergence Diagnostics

All parameters satisfied standard convergence criteria: Gelman-Rubin R̂ < 1.01 (values ≥1.05 indicate non-convergence), effective sample size > 1,000, and visual inspection of trace plots confirmed adequate chain mixing. Energy diagnostic plots showed no divergent transitions.

## A.4 Variance Decomposition

For each of 32,000 posterior samples:

Var_total = Var(α + β1t + β2t²) + Var(δd) + Var(ε)

Systemic proportion = Var(α + β1t + β2t²) / Var_total; disease-specific proportion = Var(δd) / Var_total. Credible intervals reflect full posterior uncertainty.

## A.5 Model Comparison

Leave-one-out cross-validation (LOO-IC) confirmed the full model outperformed simpler alternatives: a non-hierarchical model (omitting δd) performed substantially worse (ΔLOO = 12.7); a linear-only temporal model (omitting β2) also performed worse (ΔLOO = 8.3), supporting inclusion of both components.

## A.6 Projection Algorithm

For each of 5,000 posterior parameter samples: (1) project p_{d,t} = invlogit(α + β1t + β2t² + δd) for years 2023–2040; (2) apply stochastic variation: y_pred ~ Binomial(n_ref, p_{d,t}), where n_ref is the median historical trial size per disease; (3) for projections >15 years beyond the last observation, moderate toward the disease-specific mean: p_{d,t} ← λ·p_{d,t} + (1–λ)·invlogit(α + δd), where λ decreases linearly from 1.0 to 0.5 over the 15-year extrapolation window. Projections were bounded at [10%, 65%] to prevent implausible extrapolation. Time to parity for each disease was estimated as the year t* at which invlogit(α + β1t* + β2t*² + δd) = 0.50, solved numerically for each posterior sample.
